# Supplementary material for: Identification of Eight High Yielding Strains via Morpho-Molecular Characterization of Thirty-Three Wild Strains of Calocybe indica
Source: MDPI journal article supplement (doi:10.3390/foods12112119), 2023-05-24
Supplement: s1 [file s1]

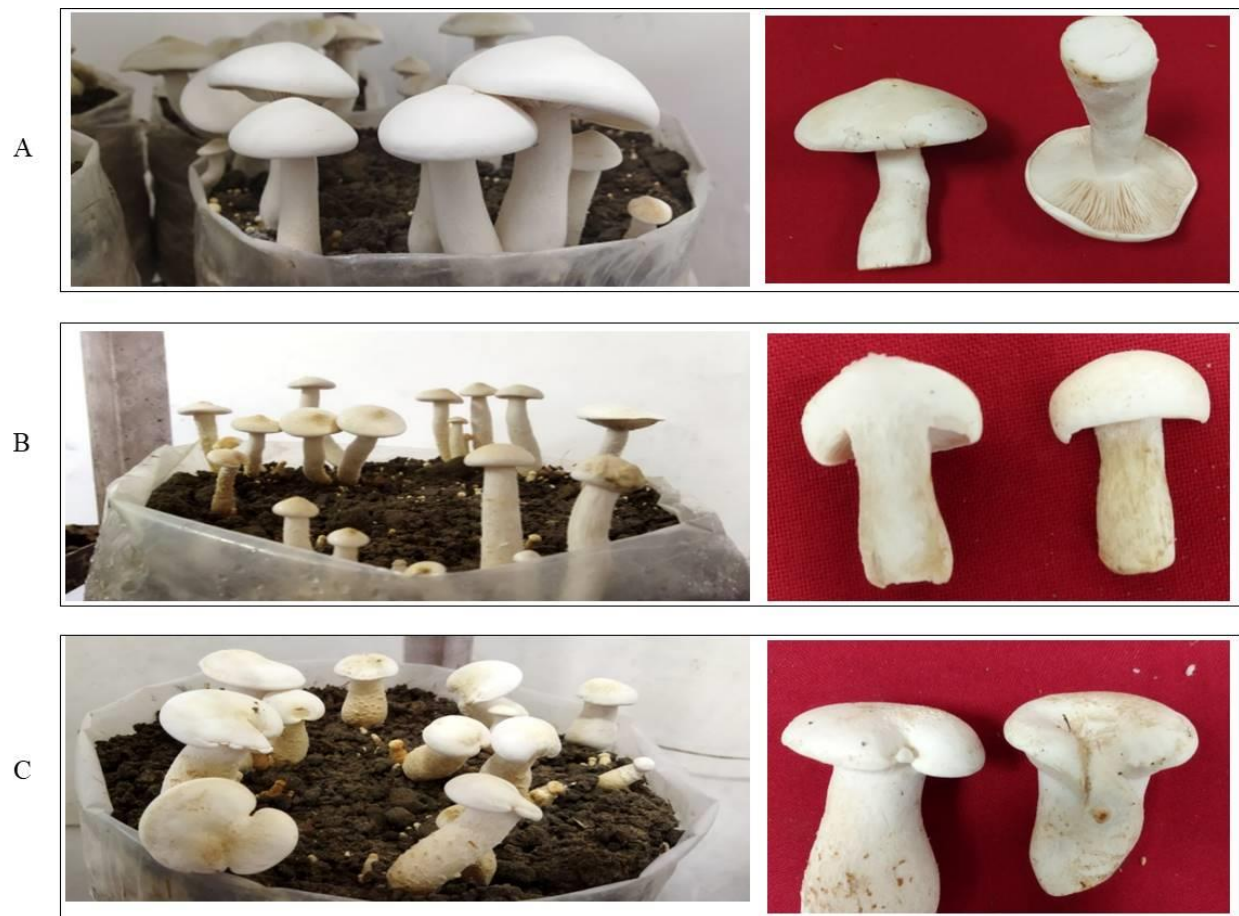

**Figure S1. Morphological variations in different strains of *C. indica*.** A. Cap campanulate with incurved margin (DMRO-321, DMRO-202 and DMRO-316); B. White to dull white Cap with brownish pigmentation and stipe with scurfy scales (DMRO-320, DMRO-325); and C. Convex to irregular cap shape (DMRO-528)
