# Supplementary material for: Identification of Eight High Yielding Strains via Morpho-Molecular Characterization of Thirty-Three Wild Strains of Calocybe indica
Source: MDPI journal article supplement (doi:10.3390/foods12112119), 2023-05-24
Supplement: s1 [file s1]

**Table S1.** Ten SRAP primers/combinations used for genetic diversity analysis

| S. No. | SRAP marker/combination |
|--------|-------------------------|
| 1      | ME7+em2                 |
| 2      | Me9+em2                 |
| 3      | Me8+em8                 |
| 4      | Me8+em5                 |
| 5      | Me7+em7                 |
| 6      | Me7+em4                 |
| 7      | Me6+em5                 |
| 8      | Me6+em9                 |
| 9      | Me9+em5                 |
| 10     | Me7+em5                 |

**Table S2.** Thirty three strains of *Calcoybe indica* along with NCBI I.D.

| S. No. | Strain    | NCBI ID  |
|--------|-----------|----------|
| 1      | DMRO-129  | ON307076 |
| 2      | DMRO-298  | ON307077 |
| 3      | DMRO-315  | ON307078 |
| 4      | DMRO-419  | ON307079 |
| 5      | DMRO-46   | ON310887 |
| 6      | DMRO-54   | ON310888 |
| 7      | DMRO-81   | ON310889 |
| 8      | DMRO-201  | ON310890 |
| 9      | DMRO-202  | ON310891 |
| 10     | DMRO-299  | ON310892 |
| 11     | DMRO-303  | ON310893 |
| 12     | DMRO-305  | ON332080 |
| 13     | DMRO-310  | ON332081 |
| 14     | DMRO-311  | ON332082 |
| 15     | DMRO-322  | ON332083 |
| 16     | DMRO-325  | ON332084 |
| 17     | DMRO-421  | ON332085 |
| 18     | DMRO-448  | ON332086 |
| 19     | DMRO-454  | ON332087 |
| 20     | DMRO-528  | ON332088 |
| 21     | DMRO-115  | ON350811 |
| 22     | DMRO-314  | ON350812 |
| 23     | DMRO-316  | ON350813 |
| 24     | DMRO-321  | ON350814 |
| 25     | DMRO-266  | OP526972 |
| 26     | DMRO-319  | OP526973 |
| 27     | DMRO-304  | OP526974 |
| 28     | DMRO-521  | OP875091 |
| 29     | DMRO-675  | OP875092 |
| 30     | DMRO-798  | OP875093 |
| 31     | DMRO-811  | OP875094 |
| 32     | DMRO-843  | OP875095 |
| 33     | DMRO-1007 | OP875096 |

**Table S3.** Mean, CD and SE of the characters studied for thirty three strains of *C. indica* along with control (DMRO-302)

| Characters | Days to first harvest * | Cap length* | Stipe length* | Stipe width* | Average fruit body weight* | BE*   |
|------------|-------------------------|-------------|---------------|--------------|----------------------------|-------|
| Mean       | 41.18                   | 6.93        | 5.37          | 1.99         | 35.85                      | 40.24 |
| C.D.       | 1.16                    | 2.28        | 5.01          | 0.69         | 20.73                      | 12.22 |
| SE(m)      | 0.41                    | 0.81        | 1.77          | 0.24         | 7.32                       | 4.32  |
| SE(d)      | 0.58                    | 1.14        | 2.50          | 0.35         | 10.36                      | 6.11  |

\* Based on one factor anova ( $P \leq 0.05$ ) for all the characters

**Table S4.** Correlation analysis

| Variables                 | Days of First Harvest | Pileus length | Stipe length | Stipe width | Average fruit body weight | BE           |
|---------------------------|-----------------------|---------------|--------------|-------------|---------------------------|--------------|
| Days of First Harvest     | <b>1</b>              | -0.197        | -0.006       | -0.136      | -0.017                    | <b>0.444</b> |
| Pileus length             |                       | <b>1</b>      | <b>0.536</b> | 0.109       | <b>0.763</b>              | <b>0.591</b> |
| Stipe length              |                       |               | <b>1</b>     | 0.210       | <b>0.460</b>              | <b>0.442</b> |
| Stipe width               |                       |               | 0.210        | <b>1</b>    | <b>0.432</b>              | 0.291        |
| Average fruit body weight |                       |               |              |             | <b>1</b>                  | <b>0.490</b> |
| BE                        |                       |               |              |             |                           | <b>1</b>     |

**Table S5.** Variability analysis

|                    | Days of First Harvest | Pileus length) | Stipe length | Stipe width | Average fruit body weight | BE    |
|--------------------|-----------------------|----------------|--------------|-------------|---------------------------|-------|
| CV(%)              | 1.72                  | 20.14          | 57.06        | 21.23       | 35.39                     | 18.59 |
| PCV(%)             | 8.58                  | 25.10          | 64.83        | 27.46       | 56.21                     | 26.67 |
| GCV(%)             | 8.40                  | 14.99          | 30.76        | 17.42       | 43.67                     | 19.12 |
| h <sup>2</sup> (%) | 95.99                 | 35.64          | 22.52        | 40.23       | 60.36                     | 51.40 |
| GAM(%)             | 16.96                 | 18.43          | 30.07        | 22.76       | 69.90                     | 28.24 |

**Table S6.** Cluster analysis

| Cluster                      | I       | II      | III    |
|------------------------------|---------|---------|--------|
| Number of objects by cluster | 18      | 6       | 10     |
| Sum of weights               | 18      | 6       | 10     |
| Within-cluster variance      | 123.273 | 307.400 | 95.325 |
| Minimum distance to centroid | 2.303   | 5.227   | 4.589  |
| Average distance to centroid | 9.230   | 13.740  | 8.791  |
| Maximum distance to centroid | 26.30   | 30.14   | 14.82  |
|                              | D-46    | D-54    | D-81   |
|                              | D-129   | D-202   | D-115  |
|                              | D-201   | D-298   | D-266  |
|                              | D-299   | D-316   | D-311  |
|                              | D-303   | D-454   | D-315  |
|                              | D-304   | D-528   | D-319  |
|                              | D-305   |         | D-325  |
|                              | D-310   |         | D-675  |
|                              | D-314   |         | D-811  |
|                              | D-321   |         | D-843  |
|                              | D-322   |         |        |
|                              | D-419   |         |        |
|                              | D-421   |         |        |
|                              | D-448   |         |        |
|                              | D-521   |         |        |
|                              | D-798   |         |        |
|                              | D-1007  |         |        |
|                              | D-302   |         |        |
